# Supplementary material
Source: PubMed Central journal article supplement (PMC11645606)
Supplement: ajtr0016-6467-f7.pdf [file ajtr0016-6467-f7.pdf]

## Body mass index in breast cancer

**Table S1.** Premenopausal patients recurrence risks (RRs)\* with (95% confidence intervals, CIs) of breast cancer (BC) for height by estrogen receptor (ER) and progesterone receptor (PR) status

| Breast cancer subtype | Number of cases | <1.55                  | 1.55≤ <1.60 | 1.60≤ <1.65            | 1.65≤ <1.70            | P-value, test for trend | P-value, test for between-studies heterogeneity, highest category |
|-----------------------|-----------------|------------------------|-------------|------------------------|------------------------|-------------------------|-------------------------------------------------------------------|
| Overall               | 175             | 1.0417 (0.9927-1.1323) | 1.0000      | 1.0645 (1.0005-1.1285) | 1.0588 (0.9827-1.1937) | 0.0714                  | 0.361                                                             |
| ER+                   | 142             | 1.0003 (0.7890-1.9990) | 1.0000      | 1.0329 (1.0158-1.0955) | 1.0769 (0.9661-1.2647) | 0.0742                  | 0.178                                                             |
| ER-                   | 33              | 1.0310 (1.1180-1.7770) | 1.0000      | 1.1818 (1.0429-1.4963) | 0.7500 (0.421-0.9630)  | 0.0286                  | 0.735                                                             |
| PR+                   | 132             | 0.0913 (0.7720-0.9890) | 1.0000      | 1.0408 (1.0229-1.0995) | 1.1000 (0.8319-1.3681) | 0.0708                  | 0.224                                                             |
| PR-                   | 43              | 1.3333 (1.0850-1.6510) | 1.0000      | 1.1538 (1.0534-1.4081) | 0.8180 (0.555-0.9750)  | 0.0317                  | 0.643                                                             |

**Table S2.** Postmenopausal patients RR\*s\* with (95% confidence intervals, CIs) of BC for height by ER and PR status

| Breast cancer subtype | Number of cases | <1.55                  | 1.55≤ <1.60 | 1.60≤ <1.65            | 1.65≤ <1.70            | 1.70≤ <1.75            | P-value, test for trend | P-value, test for between-studies heterogeneity, highest category |
|-----------------------|-----------------|------------------------|-------------|------------------------|------------------------|------------------------|-------------------------|-------------------------------------------------------------------|
| Overall               | 183             | 1.2564 (1.2156-1.4510) | 1.0000      | 1.0370 (1.0210-1.0901) | 1.1000 (0.9319-1.3681) | 0.7500 (0.4210-0.9630) | 0.0040                  | 0.237                                                             |
| ER+                   | 107             | 1.2222 (1.1409-1.5514) | 1.0000      | 1.0263 (0.9977-1.0812) | 0.8000 (0.5180-0.9720) | 0.0000                 | 0.0167                  | 0.584                                                             |
| ER-                   | 76              | 1.2857 (1.0620-1.5094) | 1.0000      | 1.0625 (0.9800-1.2075) | 1.3750 (1.0990-1.7100) | 0.7500 (0.4210-0.9630) | 0.0023                  | 0.750                                                             |
| PR+                   | 74              | 1.2500 (1.1735-1.5765) | 1.0000      | 1.0385 (0.9940-1.1214) | 0.7140 (0.3590-0.9570) | 0.0000                 | 0.0039                  | 0.982                                                             |
| PR-                   | 109             | 1.2539 (1.0746-1.4439) | 1.0000      | 1.0357 (0.9950-1.1122) | 1.1429 (0.8000-1.6286) | 0.7500 (0.4210-0.9630) | 0.0039                  | 0.358                                                             |

**Table S3.** Premenopausal patients RR\*s\* with (95% confidence intervals, CIs) of BC for height by different BC subtypes

| Breast cancer subtype         | Number of cases | <1.55                  | 1.55≤ <1.60 | 1.60≤ <1.65            | 1.65≤ <1.70            | P-value, test for trend | P-value, test for between-studies heterogeneity, highest category |
|-------------------------------|-----------------|------------------------|-------------|------------------------|------------------------|-------------------------|-------------------------------------------------------------------|
| Luminal A                     | 44              | 0.7780 (0.4730-0.9680) | 1.0000      | 1.0476 (0.9898-1.1531) | 1.3330 (1.0850-1.6510) | 0.0531                  | 0.804                                                             |
| Her-2+                        | 23              | 1.4290 (1.1180-1.7770) | 1.0000      | 1.2857 (0.9443-1.9128) | 0.7500 (0.4210-0.9630) | 0.0423                  | 0.495                                                             |
| LuminalB (HER-2+)             | 31              | 0.7780 (0.4730-0.9680) | 1.0000      | 0.8670 (0.6610-0.9820) | 0.6670 (0.2840-0.9470) | 0.0532                  | 0.722                                                             |
| LuminalB (HER-2-)             | 45              | 0.8570 (0.640-0.9810)  | 1.0000      | 1.0833 (0.9582-1.2917) | 0.7500 (0.4210-0.9630) | 0.0535                  | 0.883                                                             |
| Triple-Negative Breast Cancer | 8               |                        |             |                        |                        |                         |                                                                   |
| In Situ Carcinoma             | 17              | 0.0000                 | 1.0000      | 0.8180 (0.5550-0.9750) | 0.6670 (0.2840-0.9470) | 0.0125                  | 0.918                                                             |

## Body mass index in breast cancer

**Table S4.** Postmenopausa patients RRs\* with (95% confidence intervals, CIs) of BC for height by different BC subtypes

| Breast cancer subtype         | Number of cases | <1.55                  | 1.55≤ <1.60 | 1.60≤ <1.65            | 1.65≤ <1.70            | 1.70≤ <1.75            | P-value, test for trend | P-value, test for between-studies heterogeneity, highest category |
|-------------------------------|-----------------|------------------------|-------------|------------------------|------------------------|------------------------|-------------------------|-------------------------------------------------------------------|
| Luminal A                     | 25              | 0.7500 (0.4210-0.9630) | 1.0000      | 1.1111 (0.9083-1.4251) | 0.7140 (0.3590-0.9570) | 0.0000                 | 0.0768                  | 0.237                                                             |
| Her-2+                        | 35              | 1.2308 (1.1647-1.5276) | 1.0000      | 1.0909 (0.9474-1.3253) | 0.6670 (0.2840-0.9470) | 0.7140 (0.3590-0.9570) | 0.0255                  | 0.253                                                             |
| LuminalB (HER-2+)             | 32              | 0.5000 (0.1840-0.8160) | 1.0000      | 0.8570 (0.6400-0.9810) | 0.7140 (0.3590-0.9570) | 0.0000                 | 0.0040                  | 0.627                                                             |
| LuminalB (HER-2-)             | 33              | 1.2500 (1.0022-1.7478) | 1.0000      | 0.9050 (0.7510-0.9880) | 0.0000                 | 0.0000                 | 0.0178                  | 0.803                                                             |
| Triple-Negative Breast Cancer | 28              | 1.3333 (0.8624-1.8042) | 1.0000      | 1.1429 (0.6571-1.6286) | 0.5000 (0.1470-0.8530) | 0.6000 (0.1940-0.9320) | 0.0441                  | 0.652                                                             |
| In Situ Carcinoma             | 9               |                        |             |                        |                        |                        |                         |                                                                   |

**Table S5.** Premenopausal patients RRs\* with (95% confidence intervals, CIs) of breast cancer for BMI by ER and PR status

| Breast cancer subtype | Number of cases | <21    | 21≤ <23                | 23≤ <25                | 25≤ <27                | 27≤ <30                | 30≤                    | P-value, test for trend | P-value, test for between-studies heterogeneity, highest category |
|-----------------------|-----------------|--------|------------------------|------------------------|------------------------|------------------------|------------------------|-------------------------|-------------------------------------------------------------------|
| Overall               | 175             | 1.0000 | 1.0909 (1.0002-1.1816) | 1.0909 (1.0002-1.1816) | 1.1481 (1.1466-1.2978) | 1.1538 (1.0534-1.4081) | 0.7140 (0.3590-0.9570) | 0.0990                  | 0.805                                                             |
| ER+                   | 142             | 1.0000 | 1.0294 (0.9969-1.0913) | 1.1081 (1.1080-1.2163) | 1.0526 (0.9869-1.1710) | 1.2000 (1.0425-1.5575) | 0.6670 (0.2840-0.9470) | 0.0061                  | 0.241                                                             |
| ER-                   | 33              | 1.0000 | 1.3000 (1.1904-1.7096) | 0.8180 (0.5550-0.9750) | 1.3750 (1.1935-1.9315) | 0.7140 (0.3590-0.9570) | 0.0000                 | 0.0221                  | 0.221                                                             |
| PR+                   | 132             | 1.0000 | 1.0303 (0.9967-1.0942) | 1.1081 (1.1080-1.2163) | 1.0625 (0.9800-1.2075) | 1.1111 (0.9083-1.4251) | 0.0000                 | 0.0138                  | 0.721                                                             |
| PR-                   | 43              | 1.0000 | 1.2727 (1.1823-1.6358) | 0.8180 (0.5550-0.9750) | 1.2727 (1.1823-1.6358) | 1.3750 (1.0990-1.7100) | 0.7500 (0.2840-0.9470) | 0.0662                  | 0.569                                                             |

**Table S6.** Postmenopausa patients RRs\* with (95% confidence intervals, CIs) of breast cancer for BMI by ER and PR status

| Breast cancer subtype | Number of cases | <21    | 21≤ <23                | 23≤ <25                | 25≤ <27                | 27≤ <30                | 30≤                    | P-value, test for trend | P-value, test for between-studies heterogeneity, highest category |
|-----------------------|-----------------|--------|------------------------|------------------------|------------------------|------------------------|------------------------|-------------------------|-------------------------------------------------------------------|
| Overall               | 183             | 1.0000 | 1.2157 (1.0963-1.3350) | 1.1131 (1.0232-1.2032) | 1.2059 (1.0578-1.3540) | 1.0714 (0.9719-1.2423) | 1.6000 (1.1940-1.9320) | 0.0772                  | 0.158                                                             |
| ER+                   | 107             | 1.0000 | 1.0667 (1.0349-1.1652) | 1.0385 (0.994-1.1214)  | 1.1667 (1.1283-1.3718) | 1.2500 (0.9905-1.5095) | 0.8460 (0.6150-0.9790) | 0.0703                  | 0.229                                                             |
| ER-                   | 76              | 1.0000 | 1.4286 (1.1835-1.6736) | 1.1852 (1.0215-1.3488) | 1.2500 (1.2405-1.5095) | 1.3333 (1.0850-1.6510) | 0.0000                 | 0.0881                  | 0.379                                                             |
| PR+                   | 74              | 1.0000 | 1.1667 (1.1283-1.3718) | 0.9050 (0.7510-0.9880) | 1.1765 (1.1344-1.3950) | 0.8180 (0.5550-0.9750) | 0.0000                 | 0.0978                  | 0.152                                                             |
| PR-                   | 109             | 1.0000 | 1.2424 (1.0826-1.4022) | 1.1667 (1.0836-1.3554) | 1.2353 (1.2274-1.4784) | 1.1429 (0.8000-1.6286) | 0.6670 (0.2840-0.9470) | 0.0620                  | 0.422                                                             |

## Body mass index in breast cancer

**Table S7.** Premenopausal patients RRs\* with (95% confidence intervals, CIs) of BC for BMI by different BC subtypes

| Breast cancer subtype         | Number of cases | <21    | 21≤ <23                | 23≤ <25                | 25≤ <27                | 27≤ <30                |  | P-value, test for trend | P-value, test for between-studies heterogeneity, highest category |
|-------------------------------|-----------------|--------|------------------------|------------------------|------------------------|------------------------|--|-------------------------|-------------------------------------------------------------------|
| Luminal A                     | 44              | 1.0000 | 0.8670 (0.6610-0.9820) | 1.2000 (1.1484-1.4516) | 0.7500 (0.4210-0.9630) | 0.7140 (0.3590-0.9570) |  | 0.0591                  | 0.511                                                             |
| Her-2+                        | 23              | 1.0000 | 1.4286 (1.1702-2.5442) | 0.7500 (0.4210-0.9630) | 1.3333 (0.8005-2.5328) | 1.2630 (1.0970-1.4760) |  | 0.0724                  | 0.487                                                             |
| LuminalB (HER-2+)             | 31              | 1.0000 | 0.8000 (0.5180-0.9720) | 0.8000 (0.5180-0.9720) | 0.7140 (0.3590-0.9570) | 1.4290 (1.1180-1.7770) |  | 0.0115                  | 0.317                                                             |
| LuminalB (HER-2-)             | 45              | 1.0000 | 1.0667 (0.9756-1.2236) | 1.2730 (1.0670-1.5560) | 1.2730 (1.0670-1.5560) | 1.3750 (1.0990-1.7100) |  | 0.0188                  | 0.423                                                             |
| Triple-Negative Breast Cancer | 8               | 1.0000 |                        |                        |                        |                        |  |                         |                                                                   |
| In Situ Carcinoma             | 17              | 1.0000 | 0.7140 (0.3590-0.9570) | 0.8180 (0.5550-0.9750) | 0.7500 (0.4210-0.9630) | 0.0000                 |  | 0.0620                  | 0.199                                                             |

**Table S8.** Postmenopausa patients RRs\* with (95% confidence intervals, CIs) of BC for BMI by different BC subtypes

| Breast cancer subtype         | Number of cases | <21    | 21≤ <23                | 23≤ <25                | 25≤ <27                | 27≤ <30                | 30≤    | P-value, test for trend | P-value, test for between-studies heterogeneity, highest category |
|-------------------------------|-----------------|--------|------------------------|------------------------|------------------------|------------------------|--------|-------------------------|-------------------------------------------------------------------|
| Luminal A                     | 25              | 1.0000 | 0.7140 (0.3590-0.9570) | 0.8000 (0.5180-0.9720) | 1.1667 (0.6484-1.8514) | 0.7140 (0.3590-0.9570) | 0.0000 | 0.0690                  | 0.527                                                             |
| Her-2+                        | 35              | 1.0000 | 1.5455 (1.1395-1.9514) | 1.1667 (1.1283-1.3718) | 1.3333 (1.1957-1.8042) | 0.0000                 | 0.0000 | 0.0968                  | 0.275                                                             |
| LuminalB (HER-2+)             | 32              | 1.0000 | 1.0909 (0.8565-1.3253) | 0.8330 (0.5870-0.9770) | 1.3750 (1.0990-1.7100) | 0.6670 (0.2840-0.9470) | 0.0000 | 0.0714                  | 0.445                                                             |
| LuminalB (HER-2-)             | 33              | 1.0000 | 1.0909 (0.8565-1.3253) | 1.1429 (0.8000-1.6286) | 1.3750 (1.0990-1.7100) | 0.7500 (0.4210-0.9630) | 0.0000 | 0.0653                  | 0.490                                                             |
| Triple-Negative Breast Cancer | 28              | 1.0000 | 1.1667 (0.6486-1.8514) | 1.2500 (0.7522-1.7478) | 1.3750 (1.0990-1.7100) | 1.4290 (1.1180-1.7770) | 0.0000 | 0.0545                  | 0.715                                                             |
| In Situ Carcinoma             | 9               |        |                        |                        |                        |                        |        |                         |                                                                   |
